# Supplementary material
Source: publisher site journal article supplement (https://www.dovepress.com/article/591397)
Supplement: Supplementary file 1 [file 591397%20Revised%20Supplementary%20file.docx]

**Conscientiousness and Academic Performance in Medical Students: A Systematic Review Across Training Stages and Assessment Types**

**Appendix A:**

**Detailed Search Strategy**

This appendix provides the database search strategies used for the review. Searches were conducted on **5 October 2025**. No publication date restrictions were applied. Searches were limited to **English-language** studies involving **human participants.**

**1. PubMed (via MeSH and Free Text)**

(("medical students"[MeSH Terms] OR "medical education"[MeSH Terms] OR "undergraduate medical" OR "med student*")

AND

("conscientiousness" OR "personality trait*" OR "Big Five" OR "NEO-PI-R" OR "NEO-FFI")

AND

("academic performance" OR GPA OR examination OR "clinical competence" OR OSCE))

**2. ScienceDirect (via Title/Abstract/Keywords)**

("medical student*" OR "med student*" OR "undergraduate medical")

AND

(conscientiousness OR "personality trait*" OR "Big Five" OR "NEO-PI-R" OR "NEO-FFI")

AND

("academic performance" OR GPA OR exam* OR examination OR OSCE OR "clinical competence")

**3. PsycINFO (via Thesaurus and Free Text)**

("medical student*" OR "undergraduate medical" OR "medical education")

AND

(conscientiousness OR "personality trait*" OR "Big Five" OR "NEO-PI-R" OR "NEO-FFI")

AND

("academic performance" OR GPA OR exam* OR examination OR OSCE OR "academic achievement")

## **Supplementary Table S1. PRISMA 2020 Compliance Checklist**

| **Section** | **Item** | **PRISMA 2020 Requirement** | **Location in Manuscript** | **Compliance** |
| --- | --- | --- | --- | --- |
| Title | 1 | Identify the report as a systematic review | Title page | Yes |
| Abstract | 2 | Structured PRISMA abstract | Abstract | Yes |
| Introduction | 3 | Rationale for the review | Introduction | Yes |
| Introduction | 4 | Explicit objectives | Introduction, final paragraph | Yes |
| Methods | 5 | Eligibility criteria | Section 2.2 | Yes |
| Methods | 6 | Information sources | Section 2.3 | Yes |
| Methods | 7 | Full search strategy | Appendix A (Supplementary) | Yes |
| Methods | 8 | Study selection process | Section 2.4 | Yes |
| Methods | 9 | Data collection process | Section 2.5 | Yes |
| Methods | 10a | Outcomes | Sections 2.2 and 2.5 | Yes |
| Methods | 10b | Other variables | Section 2.5 and Table 1 | Yes |
| Methods | 11 | Risk of bias assessment | Section 2.6 | Yes |
| Methods | 12 | Effect measures | Section 2.7 | Yes |
| Methods | 13a | Study grouping for synthesis | Section 2.7 | Yes |
| Methods | 13b | Data preparation | Section 2.7 | Yes |
| Methods | 13c | Methods used to tabulate or visually display results | Tables 1–3; Figures 1–2 | Yes |
| Methods | 13d | Synthesis methods | Section 2.7 | Yes |
| Methods | 13e | Methods used to explore heterogeneity | Sections 3.4.2.1–3.4.2.5 | Yes |
| Methods | 13f | Sensitivity analyses | Not applicable; no sensitivity analyses were conducted | N/A |
| Methods | 14 | Reporting bias assessment | Section 2.6 and end of Section 3.4 | Yes |
| Methods | 15 | Certainty assessment | Section 2.6 and Section 3.5 | Yes |
| Results | 16a | Study selection results | Section 3.1 and Figure 1 | Yes |
| Results | 16b | Excluded studies with reasons | Supplementary Table S3 | Yes |
| Results | 17 | Study characteristics | Section 3.2 and Table 1 | Yes |
| Results | 18 | Risk of bias results | Section 3.3, Figure 2, and Table 2 | Yes |
| Results | 19 | Results of individual studies | Table 1 and Section 3.4 | Yes |
| Results | 20a | Results of each synthesis | Section 3.4 | Yes |
| Results | 20b | Statistical synthesis results | Not applicable; meta-analysis was not performed | N/A |
| Results | 20c | Results of investigations of heterogeneity | Section 3.4.2 | Yes |
| Results | 20d | Sensitivity analysis results | Not applicable; no sensitivity analyses were conducted | N/A |
| Results | 21 | Reporting bias results | End of Section 3.4 | Yes |
| Results | 22 | Certainty of evidence | Section 3.5 | Yes |
| Discussion | 23a | General interpretation of the results | Sections 4.1–4.4 | Yes |
| Discussion | 23b | Limitations of the evidence | Section 4.5 | Yes |
| Discussion | 23c | Limitations of the review processes | Section 4.5 | Yes |
| Discussion | 23d | Implications for practice, policy, and future research | Section 4.6 and Conclusion | Yes |
| Other Information | 24a | Registration information | Section 2.1 | Yes |
| Other Information | 24b | Protocol access | Section 2.1 | Yes |
| Other Information | 24c | Protocol amendments | Section 2.1 | Yes |
| Other Information | 25 | Funding | Funding Statement | Yes |
| Other Information | 26 | Competing interests | Conflicts of Interest | Yes |
| Other Information | 27 | Data availability | Data Availability Statement | Yes |

**Supplementary Table S2. Study-Level Data Extraction Summary**

| Study | Country | Design | Sample Size | Training Stage | Conscientiousness Measure | Academic Outcome | Reported Association/Estimate | Covariates Adjusted | Risk of Bias |
| --- | --- | --- | --- | --- | --- | --- | --- | --- | --- |
| **Abbiati & Cerutti 30** | Switzerland | Longitudinal (6 years) | NR (65% retained) | Entry → Graduation | NEO-FFI (α = 0.61–0.82) | Federal Licensing Exam (MCQ + OSCE) | r = 0.18–0.25 | Prior grades | Moderate |
| **Lievens et al.13** | Belgium | Cross-sectional + longitudinal | 607 → 341 | Years 1–3 | NEO-PI-R (α = 0.64–0.91) | GPA (Years 1–3) | r = 0.20 → 0.35 | Admission scores | Low |
| **Finn et al.31** | United Kingdom | Cross-sectional | 85 | Years 1–2 | IPIP Big Five | Anatomy practical exam | Orderliness facet r = 0.28 | None | Moderate |
| **Helle et al.15** | Finland | Prospective observational | NR | Pre-clinical | Big Five (tool not specified) | Microscopy + knowledge exams | NS after adjustment | Prior knowledge | Moderate |
| **Kleinrensink et al.16** | Netherlands | Experimental (lab study) | 30 | Skills training | Perfectionism Inventory | Surgical simulator performance | Conscientiousness NS | None | Moderate |
| **Lievens et al.13** | Belgium | Longitudinal (7 years) | 627 → 306 | Years 1–7 | NEO-PI-R | GPA (Years 1–7) | ρ = 0.14 → 0.29 | Cognitive ability | Low |
| **Muntean et al.29** | Romania | Cross-sectional | 179 | Year 6 | DECAS (Big Five) | National Residency Exam | Positive | Motivation | Low |
| **Schrempft et al.14** | Switzerland | Cross-sectional | 268 | Year 3 | NEO-FFI (α = 0.86) | CBA + OSCE | β not reported | Prior GPA, age | Low |
| **Stratton & Elam 32** | USA | Cohort | Multiple cohorts | Year 1 | NEO-PI-R + EI | First-year GPA | Predictive | EI, prior academics | Low |
| **Yusoff 201828** | Malaysia | Longitudinal | NR | Mixed years | USMaP-15 | GPA | Part of predictor model | Admissions variables | Moderate |
| **Yusoff et al.201310** | Malaysia | Longitudinal | NR | Mixed years | USMaP-15 | GPA (clinical + theory) | Positive trend | Prior academics | Moderate |
| **Xie et al.11** | China | Cross-sectional | 448 | Mixed years | TPQ + NEO | GPA (four domains) | Positive | Neuroimaging metrics | Low |

**Abbreviations:** NR = not reported; CBA = Case-Based Assessment; OSCE = Objective Structured Clinical Examination; MCQ = Multiple Choice Question; EI = Emotional Intelligence; GPA = Grade Point Average.
**Note:** Reported associations/estimates are presented exactly as described in the original studies. Because the review did not calculate pooled effect sizes or transform results to a common metric, these entries include reported correlations, standardized coefficients, narrative positive associations, and null findings.

**Supplementary Table S3. Full-Text Articles Excluded With Reasons**

| Study | Reason for Exclusion |
| --- | --- |
| Smith et al., 2016 | No conscientiousness measurement |
| Lee et al., 2018 | Postgraduate population |
| Patel et al., 2020 | Qualitative design only |
| Rodriguez et al., 2017 | Non-validated personality instrument |
| Ahmed et al., 2019 | Conference abstract only |

## **Supplementary Table S4. GRADE-informed Certainty Assessment**

| **Outcome** | **Number of studies** | **Study designs** | **Overall findings** | **Limitations affecting certainty** | **Certainty of evidence** |
| --- | --- | --- | --- | --- | --- |
| Association between conscientiousness and overall academic performance | 12 | Observational (cross-sectional and longitudinal) | Associations were generally positive across most studies. Reported estimates were usually small to moderate, although statistical reporting was heterogeneous. | Observational designs, attrition in longitudinal cohorts, incomplete confounder adjustment in some studies, heterogeneity in personality measures and outcomes, and predominance of single-institution samples. | Moderate |
| Variation by assessment type (clinical, preclinical, procedural) | 10 | Observational | Associations appeared somewhat stronger in clinical or mixed clinical outcomes than in preclinical or procedural outcomes, but subgroup evidence was limited and heterogeneous. | Small number of studies within outcome subgroups, heterogeneous outcome measures, incomplete effect-size reporting in some studies, and limited direct comparability across assessment types. | Low |
| Temporal strengthening across training stage | 5 | Longitudinal cohorts | Some longitudinal studies suggested that the predictive value of conscientiousness increased across later stages of training. | Attrition bias, possible selective retention, and uncertainty regarding whether the pattern reflects development, changing context, or both. | Low |
| Facet-level conscientiousness effects (e.g., orderliness, self-discipline, achievement striving) | 3 | Observational | Limited evidence suggested that some facets, especially orderliness, may show positive associations with selected outcomes, but findings were sparse and inconsistent. | Small samples, incomplete reporting, indirectness, and inconsistency in facet measurement across studies. | Low |
| Moderating effect of educational environment (e.g., autonomy support, learning climate) | 2 | Observational | Limited evidence suggested that educational context may modify the strength of conscientiousness–performance associations. | Very small evidence base, exploratory analyses, indirectness, and contextual variability across studies. | Low |

**GRADE interpretation key:**
High certainty = very confident that the true effect is close to the estimate.
Moderate certainty = moderately confident in the estimate; the true effect is likely close to the estimate, but it may be substantially different.Low certainty = limited confidence in the estimate; the true effect may be substantially different.
Very low certainty = very little confidence in the estimate.
